1 **Asymmetric Gait Patterns Alter the Reactive Control of**  
2 **Intersegmental Coordination Patterns during Walking**

3 **Chang Liu<sup>1</sup>, and James M. Finley<sup>1,2,3</sup>**

4

5 <sup>1</sup>Department of Biomedical Engineering, University of Southern California, Los Angeles, CA,  
6 90089

7 <sup>2</sup>Division of Biokinesiology and Physical Therapy, University of Southern California, Los Angeles,  
8 CA, 90033

9 <sup>3</sup>Neuroscience Graduate Program, University of Southern California, Los Angeles, CA, 90089

10

11 \* **Correspondence:** James M. Finley, Ph.D. Locomotor Control Lab, Division of Biokinesiology  
12 and Physical Therapy, University of Southern California, 1540 E. Alcazar St, CHP 155, Los  
13 Angeles, CA, USA 90033

14 [jmfinley@usc.edu](mailto:jmfinley@usc.edu)

15

16 **Keywords:** intersegmental coordination, asymmetry, locomotion, reactive control, angular  
17 momentum

18

19

20

21

22

23

24

25 **Abstract**

26 Recovery from perturbations during walking is primarily mediated by reactive control  
27 strategies that coordinate multiple body segments to maintain balance. Balance control is often  
28 impaired in clinical populations who walk with spatiotemporally asymmetric gait, and, as a  
29 result, rehabilitation efforts often seek to reduce asymmetries in these populations. Previous  
30 work has demonstrated that the presence of spatiotemporal asymmetries during walking does  
31 not impair the control of whole-body dynamics during perturbation recovery. However, it  
32 remains to be seen how the neuromotor system adjusts intersegmental coordination patterns to  
33 maintain invariant whole-body dynamics. Here, we determined if the neuromotor system  
34 generates stereotypical coordination patterns irrespective of the level of asymmetry or if the  
35 neuromotor system allows for variance in intersegmental coordination patterns to stabilize  
36 whole-body dynamics. Nineteen healthy participants walked on a dual-belt treadmill at a range  
37 of step length asymmetries, and they responded to unpredictable, slip-like perturbations. We  
38 used principal component analysis of segmental angular momenta to characterize  
39 intersegmental coordination patterns before, during, and after imposed perturbations. We found  
40 that two principal components were sufficient to explain ~ 95% of the variance in segmental  
41 angular momentum during both steady walking and responses to perturbations. Our results  
42 also revealed that walking with asymmetric step lengths led to changes in intersegmental  
43 coordination patterns during the perturbation and during subsequent recovery steps without  
44 affecting whole-body angular momentum. These results suggest that the nervous system allows  
45 for variance in segment-level coordination patterns to maintain invariant control of whole-body  
46 angular momentum during walking. Future studies exploring how these segmental coordination  
47 patterns change in individuals with asymmetries that result from neuromotor impairments can

- 48 provide further insight into how the healthy and impaired nervous system regulates dynamic
- 49 balance during walking.

## 50 1 Introduction

51 Bipedal locomotion is inherently unstable due to the small base of support, long single-  
52 limb support times, and sensorimotor transmission delays [1]. As a result, we must frequently  
53 generate corrective responses to maintain balance in response to both internal and external  
54 perturbations [2,3]. For example, to recover from unexpected perturbations such as slips or trips  
55 while walking, the nervous system generates reactive control strategies involving simultaneous,  
56 coordinated responses of both the upper and lower limbs [4,5]. These reactive, interlimb  
57 responses to perturbations can restore stability by generating changes in angular momentum that  
58 counteract the body's rotation toward the ground.

59 One conventional method to capture whole-body rotational dynamics during perturbation  
60 responses is to compute whole-body angular momentum (WBAM). WBAM reflects the net  
61 influence of all the body segments' rotation relative to a specified axis, which is commonly taken  
62 to project through the body's center of mass [6–8]. WBAM is highly regulated as its value  
63 remains close to zero during normal, unperturbed walking [9,10]. During perturbed walking,  
64 angular momentum dramatically deviates from that measured during unperturbed walking [6,7],  
65 and this deviation captures the features of body rotation that, if not arrested, would lead to a fall.  
66 To regain balance when encountering unexpected perturbations, the central nervous system  
67 activates muscles to accelerate body segments and restore angular momentum across multiple  
68 recovery steps [11,12].

69 Angular momentum can also capture balance impairments in populations with gait  
70 asymmetries and sensorimotor deficits such as amputees and stroke survivors. These individuals  
71 often have a higher peak-to-peak range of angular momentum than healthy controls [13–16], and  
72 the presence of gait asymmetries may contribute to balance impairments in these populations.  
73 For example, the magnitude of step length asymmetry in people-post stroke is negatively  
74 correlated with scores on the Berg Balance Scale, indicating that step length asymmetry is  
75 associated with increased fall risk [17].

76 An important question for clinical researchers is whether there is a causal relationship  
77 between gait asymmetry and the ability to maintain balance in response to perturbations during  
78 walking. Previous work demonstrated that whole-body dynamics, as measured by WBAM, do  
79 not change in response to imposed gait asymmetries in healthy individuals [7]. However, the

80 strategy that the central nervous system uses to stabilize whole-body dynamics remains to be  
81 determined. There are two distinct hypotheses capable of explaining the negligible influence of  
82 asymmetry on whole-body angular momentum. First, the central nervous system may generate  
83 stereotypical, invariant intersegmental coordination patterns in response to perturbations,  
84 irrespective of the level of asymmetry. Alternatively, the nervous system could use reactive  
85 control strategies that covary with asymmetry in a manner that would lead to invariant control of  
86 whole-body momentum. This would be consistent with the uncontrolled manifold (UCM)  
87 hypothesis, which predicts that the nervous system allows for variability in segmental angular  
88 momenta to stabilize a higher-order performance variable such as whole-body angular  
89 momentum [18].

90 Dimensionality reduction techniques, such as principal component analysis (PCA), are  
91 commonly used to capture how the central nervous system coordinates multiple limb segments  
92 [6,19]. PCA reduces the high-dimensional, multi-segmental time series data into a lower-  
93 dimensional set of latent variables capable of capturing the variance in the overall behavior.  
94 Aprigliano et al. used PCA to show that there is no difference in intersegmental coordination  
95 patterns between fall-prone older adults and healthy young adults in response to slip-like  
96 perturbations [19]. Other studies used PCA of segmental angular momentum to show that the  
97 intersegmental coordination patterns observed during recovery from slip-like perturbations are  
98 highly correlated with the patterns observed during unperturbed walking [20,21]. Together, these  
99 studies suggest that the central nervous system may adopt a preprogrammed and invariant  
100 response to perturbation recovery across different tasks and populations.

101 Here, our objective was to determine how the presence of step length asymmetries  
102 influences patterns of intersegmental coordination during slip-like perturbations. Since it has  
103 previously been demonstrated that step length asymmetry does not influence the magnitude of  
104 whole-body angular momentum, we aimed to determine if this was because the neuromotor  
105 system generates stereotypical intersegmental coordination patterns across levels of asymmetry  
106 or because the neuromotor system generates patterns of intersegmental coordination that covary  
107 with spatiotemporal asymmetry. Ultimately, our findings extend our understanding of how the  
108 healthy central nervous system coordinates intersegmental dynamics to maintain balance during  
109 walking.

## 110 2 Methods

### 111 2.1 Participant characteristics

112 A total of 19 healthy young individuals (10M,  $24 \pm 4$  yrs old) with no musculoskeletal or  
113 gait impairments participated in this study. Lower limb dominance was determined by asking  
114 participants which leg they would use to kick a ball. The study was approved by the Institutional  
115 Review Board at the University of Southern California, and all participants provided informed  
116 consent before participating. All aspects of the study conformed to the principles described in the  
117 Declaration of Helsinki.

### 118 2.2 Experiment protocol

119 Data used here were collected as part of a previous study [7], and we provide a summary  
120 of the procedures and setup below. Participants walked on an instrumented, dual-belt treadmill  
121 with force plates underneath (Bertec, USA) at 1.0 m/s for six separate trials and reacted to  
122 accelerations of the treadmill belts throughout the experiment. Although 1 m/s was slower than  
123 the reported average self-selected speed during treadmill walking [22], we chose this speed to be  
124 consistent with other investigations of the role of asymmetry during healthy gait [23–25]. For  
125 the first trial, participants walked on the treadmill for three minutes (Baseline) to obtain their  
126 natural level of step length asymmetry. Then, for subsequent trials, participants were instructed  
127 to modify their step lengths according to visual feedback provided via a display attached to the  
128 treadmill, and we informed them that random slip-like perturbations would occur during these  
129 trials. The visual feedback displayed the target step length for both right and left legs. A  
130 “success” message would appear on the screen if the participants were able to step within three  
131 standard deviations of the target step length. Participants completed a randomized sequence of  
132 five, six-minute trials with target step length asymmetries (SLA, Eq. 1) of 0%,  $\pm 10\%$ , and  $\pm$   
133 15% where 0% represents each participant’s baseline SLA.

$$134 \quad SLA = 100 * \frac{SL_{\text{left}} - SL_{\text{right}}}{SL_{\text{left}} + SL_{\text{right}}} \quad (1)$$

135  $SL_{\text{left}}$  represents left step length and  $SL_{\text{right}}$  represents the right step length. Each trial  
136 consisted of one-minute of practice walking without any perturbations, and then a total of 20  
137 perturbations were applied (10 to each belt) during the remainder of the trial. Foot strike was  
138 computed as the point when vertical ground reaction forces reached 150 N. Each perturbation

139 was remotely triggered by preprogrammed Python code and was characterized by a trapezoidal  
140 speed profile in which the treadmill accelerated at foot strike to 1.5 m/s at an acceleration of 1.6  
141 m/s<sup>2</sup>, held this speed for 0.3 s, and then decelerated back to 1.0 m/s during the swing phase of the  
142 perturbed leg. Participants were aware that they would experience perturbations during the  
143 experiment, but the perturbations were randomly triggered to occur within a range of 20 to 30  
144 steps after the previous perturbation to prevent participants from precisely anticipating  
145 perturbation timing. This range of steps was also selected to provide participants with sufficient  
146 time to reestablish their walking pattern to match with the visual feedback.

### 147 **2.3 Data Acquisition**

148 A ten-camera motion capture system (Qualisys AB, Gothenburg, Sweden) recorded 3D  
149 marker kinematics at 100 Hz and ground reaction forces at 1000 Hz. We placed a set of 19 mm  
150 spherical markers on anatomical landmarks to create a 13-segment, full-body model [26,27]. We  
151 placed marker clusters on the upper arms, forearms, thighs, shanks, and the back of heels.  
152 Marker positions were calibrated during a five-second standing trial at the beginning of each  
153 trial. We removed all joint markers after the calibration.

### 154 **2.4 Data processing**

155 We post-processed the kinematic and kinetic data in Visual3D (C-Motion, Rockville,  
156 MD, USA) and Matlab 2017a (Mathworks, USA) to compute variables of interest. Marker  
157 positions and ground reaction forces were low-pass filtered by 4<sup>th</sup> order Butterworth filters with  
158 cutoff frequencies of 6 Hz and 20 Hz, respectively. We selected the type of filter and cut-off  
159 frequency based on previous literature [3,28,29]. We calculated the achieved SLA as follows:  
160 first, we calculated the mean SLA of the four strides before each perturbation and then  
161 distributed these mean values into five equally spaced bins centered at -15%, -10%, 0, 10%, 15%  
162 with bin width equal to 5%. We used this achieved SLA instead of target SLA as the independent  
163 variable in our statistical analyses. We categorized Baseline (BSL) steps as the two steps before  
164 the perturbation occurred, perturbation (PTB) steps as the step during which the perturbation was  
165 applied, and recovery (REC) steps as the steps that followed the perturbation. Since we did not  
166 find any differences between left and right perturbations, our current analysis includes only  
167 perturbations of the right limb [7]. We also focused our analysis on angular momentum about the  
168 pitch axis as this was the direction in which the most prominent changes in WBAM were

169 observed. Only minor deviations in WBAM about the roll and yaw axes occurred during the  
170 perturbation and recovery steps [7].

## 171 **2.5 Segmental Angular Momentum**

172 We created a 13-segment, whole-body model in Visual3D and calculated the angular  
173 momentum of each segment about the body's center of mass. Segmental angular momenta ( $L_s^i$ )  
174 captured how the rotational behavior of each body segment changed in response to the treadmill  
175 perturbations. The model included the following segments: head, thorax, pelvis, upper arms,  
176 forearms, thighs, shanks, and feet. The limb segments' mass was modeled based on  
177 anthropometric tables [30], and segment geometry was modeled based on the description in  
178 Hanavan [31]. All segments were modeled with six degrees of freedom, and we did not define  
179 any constraints between segments. Segmental linear and angular velocity were computed using  
180 Eq. 2 [15].

$$181 \quad L_s^i = \frac{m_i(r_{CM-i} \times v_{CM-i}) + I^i\omega^i}{MVH} \quad (2)$$

182 Here,  $m_i$  is segmental mass,  $r_{CM-i}$  is a vector from the segment's COM to the body's COM,  
183  $v_{CM-i}$  is the velocity of each segment's COM relative to the body's COM,  $I^i$  is the segmental  
184 moment of inertia,  $\omega^i$  is segmental angular velocity, and the index  $i$  corresponds to individual  
185 limb segments. Lastly, we normalized momentum by the participant's mass ( $M$ ), baseline  
186 treadmill velocity ( $V$ ), and the participant's height ( $H$ ) (Eq. 2) following previous literature  
187 [9,16]. Since our statistical analysis used a within-subject design, the choice of variables used for  
188 normalization should not affect the statistical results. The convention for measuring angular  
189 momentum was defined such that positive values represented backward rotation.

## 190 **2.6 Principal component analysis (PCA)**

191 We used principal component analysis (PCA) to extract intersegmental coordination  
192 patterns for each step cycle. Before performing PCA, we first time normalized the time series of  
193 segmental angular momenta to 100 points for each step cycle. Then, for each participant, we  
194 generated an  $L_s$  matrix for each achieved SLA ( $\pm 15\%$ ,  $\pm 10\%$ ,  $\pm 5\%$ ,  $0\%$ ) and step type  
195 (BSL1, BSL2, PTB, REC1, REC2, REC3, REC4) with  $n\_steps*100$  rows and 13 columns. On  
196 average, we created 6 (achieved SLA) by 7 (step types) matrices per participant as not all  
197 participants achieved each desired level of asymmetry. We then standardized each matrix to have



198 zero mean and performed PCA to extract subject-specific coordination patterns using the *pca*  
199 function in Matlab's Statistical and Machine Learning Toolbox. Using PCA, we decomposed the  
200 segmental angular momenta data into 1) a weighting coefficient matrix consisting of principal  
201 components (PCs) ordered according to their variance accounted for (VAF) and 2) time series  
202 scores which represented the activation of each PC throughout the step cycle (Figure 1). We  
203 retained the number of PCs necessary to account for at least 90% of variance in  $L_s$ .

204

205 **Figure 1:** (A) Sagittal plane angular momentum ( $L_x$ ) for 13 segments during one representative  
206 baseline stride (black) and one perturbation stride (grey). The segments included the thigh,  
207 shank, foot, forearm, and upper arm, bilaterally as well as the head, pelvis, and thorax. The  
208 duration of each trace is one full stride from 0 to 100% of the stride cycle. (B) Schematic of  
209 principal component analysis (PCA) of segmental angular momentum. The organization of the  
210 data used as input to the PCA is illustrated to the left. PCA extracts weighting coefficient as  
211 intersegmental coordination patterns or principal components (PC1 and PC2) and time series  
212 scores of each PC (Filled bar plots: PC1; Open bar plots: PC2).

213

## 214 2.7 Comparison of intersegmental coordination patterns

215 To investigate how intersegmental coordination patterns changed after each perturbation,  
216 we compared the PCs extracted from the perturbation and recovery steps to the PCs extracted  
217 from baseline steps. We computed the included angle ( $\theta_{\text{step}}$ , Eq. 3) between each pair of PCs as  
218 this is a common method to compare the similarity between vectors in a high-dimensional space.  
219 The included angle of the unit vectors was between  $0^\circ$  (parallel and identical) and  $90^\circ$   
220 (orthogonal and most dissimilar) [32].

$$221 \quad \theta_{\text{step}} = \cos^{-1} (\overrightarrow{PC_{\text{baseline}}} \cdot \overrightarrow{PC_{\text{post}}}) \quad (3)$$

222 We then determined if the included angle between perturbation steps and baseline steps  
223 was outside the distribution of included angles observed during unperturbed baseline walking.  
224 To this end, we performed a permutation test that randomly and repeatedly selected two groups  
225 of ten baseline steps for each participant. For each permutation, we first performed PCA for each  
226 group of 10 steps and then calculated the included angle between the two PCs. We repeated this  
227 shuffling process 10000 times for each participant. We used the median of this distribution as a  
228 threshold to determine if the included angle for post-perturbation values was greater than what  
229 would be expected from step-to-step variance.

230 Similarly, we computed the included angle between PCs extracted during walking at  
231 different levels of asymmetry to those extracted from symmetrical walking to investigate how  
232 asymmetry influenced intersegmental coordination patterns. (Eqn. 4).

$$233 \quad \theta_{\text{asym}} = \cos^{-1} (\overrightarrow{PC_{\text{sym}}} \cdot \overrightarrow{PC_{\text{asym}}}) \quad (4)$$

234 We also determined if the differences in coordination observed during walking with  
235 different levels of asymmetry were above the level of variance observed during symmetrical  
236 walking. As described above, we obtained a reference distribution of included angles from  
237 symmetric walking to determine if the included angle for each level of asymmetry was greater  
238 than would be expected from natural, step-to-step variance.

## 239 **2.8 Statistical analysis**

240 All statistical analyses were performed in R (3.4.3) using linear mixed-effects (LME)  
241 models. We used the lme4 package to fit the model, the multcomp comparison for multiple  
242 comparisons [33], and lmerTest package to calculate p-values [34]. Residual normality was  
243 confirmed using the Shapiro-Wilk test. When computing p-values, we used the Satterthwaite  
244 approximation for the degrees of freedom based on differences in variance between conditions.  
245 We used the Bonferroni correction for multiple comparisons for all post-hoc analyses. For each  
246 model, we determined if random effects were necessary by comparing a model including random  
247 intercepts for each participant against a model with only fixed effects. The most parsimonious  
248 model was chosen based on the results of a likelihood ratio test. The random effects were  
249 included to account for the individual differences between subjects. Significance was set at  
250  $p < 0.05$  level.

251 We first determined if the PCs extracted from the recovery steps differed from the PCs  
252 extracted from the baseline steps during symmetrical walking. Here, the independent variable  
253 was step type, and the dependent variable was  $\theta_{\text{step}}$ . The models were fit for both PC1 and PC2.  
254 We performed a log transformation of the dependent variable ( $\theta_{\text{step}}$ ) to ensure that the residuals  
255 were normally distributed. Then, we determined if intersegmental coordination patterns during  
256 asymmetrical walking differed from those during symmetrical walking. For this analysis, we  
257 used Welch's t-test to evaluate if the included angle between the PCs extracted from the  
258 asymmetrical trials and those extracted from symmetric walking were greater than what would

259 be expected by chance. We used Welch's t-test because the included angle was not normally  
260 distributed.

261 Lastly, we determined if the included angle between each asymmetric trial and symmetric  
262 walking varied with the magnitude or direction of asymmetry. For this analysis, the independent  
263 variables were the magnitude of asymmetry, the direction of asymmetry, and the interaction  
264 between asymmetry magnitude and direction, and the dependent variable was  $\theta_{\text{asym}}$ . We fit  
265 separate linear mixed-effect models for each of five steps (Baseline1, Baseline2, Perturbation,  
266 Recovery 1 and Recovery 2) and each PC. We performed a log transformation of the dependent  
267 variable ( $\theta_{\text{asym}}$ ) to ensure that the residuals were normally distributed.

### 268 **3 Results**

269 For all steps, two principal components accounted for ~95% of the variance in segmental  
270 angular momentum (Table 1). On average, PC1 explained  $74 \pm 4\%$  of the variance, and PC2  
271 explained  $22 \pm 1\%$  of the variance, while PC3 accounted for less than 3% of the variance. Thus,  
272 the remaining analysis focuses on the first two PCs.

273 Table 1: Variance accounted for (VAF) for PC1, PC2, and PC3 during baseline steps,  
274 perturbation steps, and recovery steps.

| Step Type          | PC1          | PC2          | PC3         | Sum          |
|--------------------|--------------|--------------|-------------|--------------|
| Baseline steps     | $74 \pm 4\%$ | $22 \pm 5\%$ | $2 \pm 1\%$ | $98 \pm 1\%$ |
| Perturbation steps | $75 \pm 5\%$ | $20 \pm 5\%$ | $3 \pm 1\%$ | $98 \pm 1\%$ |
| Recovery steps     | $74 \pm 3\%$ | $21 \pm 4\%$ | $3 \pm 1\%$ | $98 \pm 1\%$ |
| All steps          | $74 \pm 4\%$ | $22 \pm 4\%$ | $2 \pm 1\%$ | $98 \pm 1\%$ |

275

#### 276 **3.1 Patterns of intersegmental coordination when walking with equal step lengths**

277 Contributions from the lower extremities were typically dominant in the first PC, while  
278 contributions from the arms, pelvis, thorax, and head were less prominent (Figure 2). During  
279 right steps, the left leg was in the swing phase and generated more positive momentum about the  
280 body's COM, while the right leg generated negative momentum. Thus, the weighting coefficients  
281 for the left leg segments (left thigh, shank, and foot) were positive while the coefficients for the  
282 right leg segments were negative. Similarly, during a left step, the right leg was in the swing  
283 phase and generated more positive momentum about COM, while the left leg generated negative  
284 momentum. Thus, the weighting coefficients were positive while the coefficients for the left leg

285 segments were negative. Overall, the first PC captured the opposing momenta of the two legs  
286 resulting from differences in the direction of rotation relative to the body's center of mass.

287 **Figure 2:** Principal components (PC) extracted from segmental angular momentum during (A)  
288 baseline right steps, (B) baseline left steps, (C) perturbation steps, (D) recovery left steps, and  
289 (E) recovery right steps when walking symmetrically (N=17). Blue: Right step; Pink: Left step;  
290 Filled bars: PC1; Unfilled bars: PC2. The 13 segments include: RTH (right thigh), RSH (right  
291 shank), RFT (right foot), LTH (left thigh), LSH (left shank), LFT (left foot), LFA (left forearm),  
292 RFA (right forearm), LUA (left upper arm), RUA (right upper arm), H (head), PEL (pelvis),  
293 THX (thorax).

294

295 For PC2, weighting coefficients for distal segments were also larger than the weighting  
296 coefficients for proximal segments, although the coefficient for the thorax (THX) increased  
297 compared to that in PC1. During the right step, the left thigh and left shank's momenta opposed  
298 the momentum of the left foot. Similarly, during the left step, the right thigh and shank momenta  
299 opposed the right foot momentum. Thus, PC2 captured intralimb cancellation of segmental  
300 momenta.

### 301 3.2 Effects of perturbations on patterns of intersegmental coordination

302 During the perturbation step, there was a significant increase in the included angle, which  
303 indicated that the intersegmental coordination patterns during perturbation steps differed from  
304 the coordination patterns during baseline steps (Figure 3). For this analysis, the results of the log-  
305 likelihood ratio test revealed that random effects were necessary for the regression model. For  
306 PC1, we found that the intersegmental coordination patterns were significantly different from the  
307 patterns during baseline walking for the perturbation steps ( $t(54)=18.2$ ,  $p<2e-16$ ), first recovery  
308 steps ( $t(54)=11.8$ ,  $p<2e-16$ ), and second recovery steps ( $t(54)=8.4$ ,  $p=2.3e-11$ ). Similarly, for  
309 PC2, intersegmental coordination differed during perturbation steps ( $t(54)=11.8$ ,  $p<2.0e-16$ ), first  
310 recovery steps ( $t(36)=6.7$ ,  $p<2e-16$ ), and second recovery steps ( $t(54)=4.9$ ,  $p=8.9e-6$ ). There was  
311 no significant difference between intersegmental coordination patterns during the third recovery  
312 steps for either PC1 ( $p = 0.97$ ) or PC2 ( $p = 0.14$ ). Thus, participants generally were able to  
313 restore their coordination patterns to baseline by the third recovery step.

314

315 **Figure 3:** Included angle between PCs extracted during each step relative to baseline steps  
316 during symmetric walking (\*\*  $p<0.001$ ). The horizontal bars and corresponding stars indicate

317 significant differences in the included angle. The data are represented as boxplots such that the  
318 lower and upper edges of the box indicate the 25<sup>th</sup> and 75<sup>th</sup> percentile of the data, respectively.  
319 The horizontal line in each box indicates the median. The whiskers extend to the furthest data  
320 point beyond the lower or upper edges of the box that is within a distance of 1.5 times the middle  
321 50<sup>th</sup> percentile of the data. Dots that lie beyond the whiskers indicate outliers. Blue: Right step;  
322 Pink: Left step; Filled box plots: PC1; Non-filled box plots: PC2. The black line indicates the  
323 mean of the permuted angle distribution of baseline steps and the shading indicates the  
324 standard deviation.

325

### 326 **3.3 Effects of step length asymmetry on patterns of intersegmental coordination**

327 Although the general patterns of intersegmental coordination were similar across levels  
328 of asymmetry, asymmetric walking patterns led to measurable changes in the contributions of the  
329 distal lower extremity segments (Figure 4). Qualitatively, we observed increased weights at the  
330 left foot as well as decreased weights of the left shank segment for the first principal component  
331 during right steps. This likely reflected the need for longer left steps and faster foot swing for  
332 positive step length asymmetries.

333 **Figure 4:** The first intersegmental coordination pattern (PC1) and the second coordination  
334 pattern (PC2) during (A) baseline right step, (B) perturbation step, and (C) the second recovery  
335 step with -15%, 0% and 15% step length asymmetry. The colored bars indicate the mean value  
336 across all participants (N=17), and the black lines indicate the standard deviation.

337

338 As the magnitude of achieved asymmetry increased, we observed an increase in the  
339 deviation of intersegmental coordination patterns from symmetrical walking (Figure 5). Results  
340 of log-likelihood ratio tests showed that random intercepts were required in the regression  
341 models. One outlier was removed before fitting the linear mixed model for the perturbation step  
342 for PC2 because it was more than three standard deviations higher than the median of the  
343 included angles. Excluding the outlier did not change the statistical outcome. All included angles  
344 differed from the permuted estimate of included angles ( $p < 0.05$ ), indicating that intersegmental  
345 coordination at each level of asymmetry differed from the coordination pattern during  
346 symmetrical walking. For all steps, we observed a significant main effect of asymmetry on the  
347 included angle between the PCs from the asymmetric trials and the symmetric trial (Table 2).

348 Table 2 Statistical results from the ANOVA examining the effects of asymmetry and direction on  
 349 the included angle for each step type.

| Step Type    | PC  | Factor           | numDF    | denDF     | F-value     | P value          |
|--------------|-----|------------------|----------|-----------|-------------|------------------|
| Baseline1    | PC1 | <b>Asym</b>      | <b>2</b> | <b>73</b> | <b>9.7</b>  | <b>&lt;0.001</b> |
|              |     | Direction        | 1        | 77        | 2.4         | 0.13             |
|              |     | Asym:Direction   | 2        | 74        | 0.6         | 0.55             |
|              | PC2 | <b>Asym</b>      | <b>2</b> | <b>72</b> | <b>14.4</b> | <b>&lt;0.001</b> |
|              |     | <b>Direction</b> | <b>1</b> | <b>78</b> | <b>4.0</b>  | <b>0.049</b>     |
|              |     | Asym:Direction   | 2        | 74        | 0.08        | 0.92             |
| Baseline2    | PC1 | <b>Asym</b>      | <b>2</b> | <b>72</b> | <b>5.7</b>  | <b>0.005</b>     |
|              |     | Direction        | 1        | 75        | 1.3         | 0.26             |
|              |     | Asym:Direction   | 2        | 73        | 0.1         | 0.88             |
|              | PC2 | <b>Asym</b>      | <b>2</b> | <b>71</b> | <b>11.0</b> | <b>&lt;0.001</b> |
|              |     | Direction        | 1        | 74        | 0.007       | 0.93             |
|              |     | Asym:Direction   | 2        | 72        | 2.2         | 0.12             |
| Perturbation | PC1 | <b>Asym</b>      | <b>2</b> | <b>73</b> | <b>19.0</b> | <b>&lt;0.001</b> |
|              |     | Direction        | 1        | 75        | 1.9         | 0.18             |
|              |     | Asym:Direction   | 2        | 73        | 0.5         | 0.59             |
|              | PC2 | <b>Asym</b>      | <b>2</b> | <b>72</b> | <b>8.7</b>  | <b>&lt;0.001</b> |
|              |     | Direction        | 1        | 73        | 1.3         | 0.25             |
|              |     | Asym:Direction   | 2        | 72        | 0.68        | 0.51             |
| Recovery1    | PC1 | <b>Asym</b>      | <b>2</b> | <b>74</b> | <b>11.2</b> | <b>&lt;0.001</b> |
|              |     | Direction        | 1        | 78        | 0.1         | 0.74             |
|              |     | Asym:Direction   | 2        | 75        | 1.3         | 0.29             |
|              | PC2 | <b>Asym</b>      | <b>2</b> | <b>72</b> | <b>9.1</b>  | <b>&lt;0.001</b> |
|              |     | Direction        | 1        | 75        | 0.1         | 0.72             |
|              |     | Asym:Direction   | 2        | 73        | 0.8         | 0.45             |
| Recovery2    | PC1 | <b>Asym</b>      | <b>2</b> | <b>72</b> | <b>8.7</b>  | <b>&lt;0.001</b> |
|              |     | Direction        | 1        | 75        | 1.8         | 0.18             |
|              |     | Asym:Direction   | 2        | 73        | 0.4         | 0.67             |
|              | PC2 | <b>Asym</b>      | <b>2</b> | <b>73</b> | <b>8.5</b>  | <b>&lt;0.001</b> |
|              |     | Direction        | 1        | 77        | 1.9         | 0.18             |
|              |     | Asym:Direction   | 2        | 74        | 0.2         | 0.84             |

351 **Figure 5:** included angle between PCs extracted during asymmetrical walking (5%, 10%, and  
352 15%) and symmetrical walking for each step (\*\* $p < 0.001$ , \*\*  $p < 0.01$ , \*  $p < 0.05$ ). Blue: Right  
353 step; Pink: Left step; Filled box plots: PC1; Non-filled box plots: PC2. The shaded gray area  
354 indicated the standard deviation of permuted included angle for each step, and the black line  
355 indicated the mean of the distribution.

356

357 The included angle between the PCs extracted during asymmetric walking and symmetric  
358 walking increased with the magnitude of achieved asymmetry (Figure 5). Specifically, the  
359 difference between intersegmental coordination patterns was greater when walking with 15%  
360 asymmetry compared to 5% asymmetry during right baseline steps (Bonferroni corrected  
361  $p < 0.001$ ), perturbation steps (Bonferroni corrected  $p < 0.001$ ), first recovery steps (Bonferroni  
362 corrected  $p = 0.03$ ) and second recovery steps (Bonferroni corrected  $p = 0.002$ ) for PC1. The  
363 difference in included angles was also significantly different from 5% asymmetry for PC2 when  
364 walking with 15% asymmetry during baseline right steps (Bonferroni corrected  $p = 0.01$ ) and  
365 perturbation steps (Bonferroni corrected  $p = 0.003$ ) and second recovery steps (Bonferroni  
366 corrected  $p = 0.04$ ). Lastly, there was only an effect of the direction of asymmetry for PC2 ( $F(1,$   
367  $79)$ ,  $p = 0.049$ ) during the baseline right step (Baseline 1).

#### 368 **4 Discussion**

369 We investigated how step length asymmetry affected intersegmental coordination  
370 patterns during responses to treadmill-based slip perturbations during walking. Our central  
371 finding was that intersegmental coordination patterns observed during asymmetrical walking  
372 differed from symmetrical walking during both unperturbed walking and perturbation recovery.  
373 When combined with previous observations that the reactive control of overall WBAM is not  
374 influenced by asymmetry [7], these results indicate that healthy people use a flexible  
375 combination of intersegmental coordination patterns rather than invariant reactions to maintain  
376 WBAM during perturbation responses when walking with asymmetric gait patterns.

377 Variations in coordination patterns during asymmetrical walking likely resulted from  
378 changes in the momentum generated by the lower extremities to reach the target asymmetry.  
379 Since the distal segments of the lower limbs are relatively far from the body's center of mass and  
380 have a high velocity, they make the largest contribution to changes in intersegmental  
381 coordination patterns. For example, to achieve a positive asymmetry, participants placed their

382 left foot further in front of the center of mass and increased the extension of their right hip so that  
383 the right foot was further behind their COM at heel strike. To achieve this objective, participants  
384 had to increase swing velocity. This likely explains why we observed increased weights of the  
385 left foot as SLA increased during right steps in the first principal component since positive step  
386 length asymmetries required longer left steps and faster foot swing.

387         The observation that reactive control of WBAM is consistent across levels of asymmetry  
388 [7] despite the variation in intersegmental coordination observed here may indicate that WBAM  
389 is a task-level variable that is stabilized by the nervous system during perturbation recovery. This  
390 is consistent with the framework proposed by the uncontrolled manifold hypothesis (UCM),  
391 which argues that the central nervous system allows for variability over a manifold of solutions  
392 that all successfully stabilize a higher-level performance variable [35]. Here, WBAM would  
393 serve as a high-level performance variable that is stabilized through covariation of elemental,  
394 segmental-level momenta. For example, Papi et al. demonstrated a similar concept when they  
395 found no differences between people post-stroke and healthy individuals in COM displacement  
396 during the stance phase of walking despite between-group differences in lower extremity joint  
397 kinematics [36]. Therefore, it is possible that when dynamic stability is challenged during  
398 walking, the central nervous system carefully regulates WBAM while allowing variance in  
399 lower-level, intersegmental coordination patterns.

400         In this study, we provided visual information about the desired and actual step lengths at  
401 each foot-strike throughout all trials, including the perturbation and recovery steps. Participants  
402 were encouraged to achieve the target step lengths for as many steps as possible, and therefore  
403 participants may have relied on this feedback during perturbation recovery to return to their pre-  
404 perturbation walking patterns faster than they otherwise would without visual feedback.  
405 However, participants' reactive response is unlikely to influence measures of momentum until  
406 late into the first recovery step as the step length information was only shown after the foot-strike  
407 of the first recovery step. It remains to be seen if patterns of interlimb coordination would differ  
408 in the presence of asymmetries that are not guided by online visual feedback.

409         Although the reactive intersegmental coordination patterns were significantly different  
410 from those observed during unperturbed locomotion, the overall patterns were qualitatively  
411 similar across steps. Taken together, these results may reflect two keys aspects of coordination



412 during perturbed walking. First, the qualitative similarity between pre- and post-perturbation  
413 patterns observed here and in previous work [21] may reflect the dominant coordination patterns  
414 that characterize both unperturbed and perturbed bipedal walking. In contrast, the statistical  
415 differences between pre- and post-perturbation coordination patterns may reflect the changes in  
416 coordination necessary to maintain balance in response to perturbations. Patterns of  
417 intersegmental coordination observed during responses to external perturbations during walking  
418 likely capture a combination of passive limb dynamics, stereotypical pattern generation, and  
419 reactive balance control responses [37].

420 We observed that the upper limbs' contribution to the control of angular momentum in  
421 the sagittal plane was negligible compared with lower limb segments during perturbation  
422 recovery. Since a stepping response is sufficient to restore balance from the treadmill  
423 accelerations used in this study, increases in momentum from the lower extremities may have  
424 been sufficient to restore sagittal plane WBAM. Consistent with our findings, Pijnappels et al.  
425 also found that arm movements had a small effect on body rotation in the sagittal plane during  
426 tripping over obstacles which elicits excessive forward rotation similar to the current study [38].  
427 However, during larger perturbations that trigger backward falls, the arms elevate to shift the  
428 body's center of mass back within the base of support [4]. This difference in the role of the arms  
429 across studies of perturbation recovery may result from the use of a larger velocity and  
430 displacement of the foot in the Marigold et al. [4] study. However, it remains to be seen how  
431 systematic variation of the magnitude and direction of external perturbations influences the role  
432 of the upper extremities during balance recovery.

433 Our results may also have implications for understanding the potential effects of  
434 interventions designed to reduce gait asymmetries in people post-stroke, as this is a common  
435 rehabilitation objective in this population [39]. Based on the current results, we would expect  
436 that reducing asymmetry in people post-stroke would also affect their reactive control strategies.  
437 However, further investigation is necessary to determine if reductions in asymmetry affect  
438 interlimb coordination during reactions to perturbations. The data from the current study  
439 illustrate how the intact neuromotor system modulates coordination between the upper and lower  
440 extremities in response to changes in asymmetry, and these data could serve as useful reference  
441 data to understand how sensorimotor impairments such as muscle weakness [40] and

442 transmission delays [41] affect the ability to restore WBAM during perturbation recovery in  
443 people post-stroke.

## 444 **5 Acknowledgments**

445 We thank Natalia Sanchez, Ph.D., for her insights during the design of this experiment  
446 and Aram Kim for her assistance with the statistical analysis.

## 447 **6 Author Contributions**

448 C.L designed the experiment, collected data, analyzed data, and wrote the manuscript.  
449 J.M.F conceived of the experiment, advised in data analyses, and edited the manuscript.

## 450 **7 Conflict of Interest Statement**

451 The authors declare that the research was conducted in the absence of any commercial or  
452 financial relationships that could be construed as a potential conflict of interest.

453 **8**      **References**

- 454 1. Winter DA. Human balance and posture control during standing and walking. *Gait*  
455 *Posture*. 1995;3: 193–214. doi:10.1016/0966-6362(96)82849-9
- 456 2. Tang PF, Woollacott MH, Chong RKY. Control of reactive balance adjustments in  
457 perturbed human walking: Roles of proximal and distal postural muscle activity. *Exp*  
458 *Brain Res*. 1998;119: 141–152. doi:10.1007/s002210050327
- 459 3. Winter DA. Biomechanics and Motor Control of Human Movement. *Motor Control*. 2009.  
460 doi: 10.1002/9780470549148
- 461 4. Marigold DS, Bethune AJ, Patla AE. Role of the unperturbed limb and arms in the  
462 reactive recovery response to an unexpected slip during locomotion. *J Neurophysiol*.  
463 2003;89: 1727–1737. doi:10.1152/jn.00683.2002
- 464 5. Wang T-Y, Bhatt T, Yang F, Pai Y-C. Adaptive control reduces trip-induced forward gait  
465 instability among young adults. *J Biomech*. 2012/02/28. 2012;45: 1169–1175.  
466 doi:10.1016/j.jbiomech.2012.02.001
- 467 6. Martelli D, Luciani LB, Micera S. Angular Momentum During Unexpected  
468 Multidirectional Perturbations Delivered While Walking. *IEEE Trans Biomed Eng*.  
469 2013;60: 1785–1795.
- 470 7. Liu C, De Macedo L, Finley MJ. Conservation of Reactive Stabilization Strategies in the  
471 Presence of Step Length Asymmetries during Walking. *Front Hum Neurosci*. 2018;12:  
472 251. doi:doi: 10.3389/fnhum.2018.00251
- 473 8. Pijnappels M, Bobbert MF, Van Dieën JH. Push-off reactions in recovery after tripping  
474 discriminate young subjects, older non-fallers and older fallers. *Gait Posture*. 2005;21:  
475 388–394. doi:10.1016/j.gaitpost.2004.04.009
- 476 9. Herr HM, Popovic M. Angular momentum in human walking. *J Exp Biol*. 2008;211: 467–  
477 81. doi:10.1242/jeb.008573
- 478 10. Popovic M, Hofmann A, Herr H. Angular momentum regulation during human walking:  
479 biomechanics and control. *Robotics and Automation, 2004 Proceedings ICRA'04 2004*  
480 *IEEE International Conference on. IEEE; 2004. pp. 2405–2411.*
- 481 11. Simoneau GC, Krebs DE. Whole-Body Momentum during Gait: A Preliminary Study of  
482 Non-Fallers and Frequent Fallers. *J Appl Biomech*. 2000;16: 1–13. doi:10.1123/jab.16.1.1
- 483 12. Pijnappels M, Bobbert MF, Van Dieën JH. Contribution of the support limb in control of  
484 angular momentum after tripping. *J Biomech*. 2004;37: 1811–1818.  
485 doi:10.1016/j.jbiomech.2004.02.038
- 486 13. Vistamehr A, Kautz SA, Bowden MG, Neptune RR. Correlations between measures of  
487 dynamic balance in individuals with post-stroke hemiparesis. *J Biomech*. 2016;49: 396–  
488 400. doi:10.1016/j.jbiomech.2015.12.047
- 489 14. Nott CR, Neptune RR, Kautz SA. Relationships between frontal-plane angular momentum  
490 and clinical balance measures during post-stroke hemiparetic walking. *Gait Posture*.  
491 2014;39: 129–34. doi:doi:10.1016/j.gaitpost.2013.06.008. Relationships
- 492 15. Silverman AK, Neptune RR. Differences in whole-body angular momentum between

- 493 below-knee amputees and non-amputees across walking speeds. *J Biomech.* 2011;44:  
494 379–385. doi:10.1016/j.jbiomech.2010.10.027
- 495 16. Honda K, Sekiguchi Y, Muraki T, Izumi SI. The differences in sagittal plane whole-body  
496 angular momentum during gait between patients with hemiparesis and healthy people. *J*  
497 *Biomech.* 2019;86: 204–209. doi:10.1016/j.jbiomech.2019.02.012
- 498 17. Lewek MD, Bradley CE, Wutzke CJ, Zinder SM. The Relationship Between  
499 Spatiotemporal Gait Asymmetry and Balance in Individuals With Chronic Stroke. *J Appl*  
500 *Biomech.* 2014;30: 31–36. doi:10.1123/jab.2012-0208
- 501 18. Latash ML, Ansen GJ, Anson JG. Synergies in Health and Disease: Relations to Adaptive  
502 Changes in Motor Coordination. *Phys Ther.* 2006;86: 1151–1160.
- 503 19. Aprigliano F, Martelli D, Tropea P, Pasquini G, Micera S, Monaco V. Ageing does not  
504 affect the intralimb coordination elicited by slip-like perturbation of different intensities. *J*  
505 *Neurophysiol.* 2017; jn.00844.2016. doi:10.1152/jn.00844.2016
- 506 20. Martelli D, Vashista V, Micera S, Agrawal SK. Direction-Dependent Adaptation of  
507 Dynamic Gait Stability Following Waist-Pull Perturbations. *IEEE Trans Neural Syst*  
508 *Rehabil Eng.* 2016;24: 1304–1313. doi:10.1109/TNSRE.2015.2500100
- 509 21. Aprigliano F, Martelli D, Micera S, Monaco V. Intersegmental coordination elicited by  
510 unexpected multidirectional slipping-like perturbations resembles that adopted during  
511 steady locomotion. *J Neurophysiol.* 2016;115: 728–740. doi:10.1152/jn.00327.2015
- 512 22. Plotnik M, Azrad T, Bondi M, Bahat Y, Gimmon Y, Zeilig G, et al. Self-selected gait  
513 speed - Over ground versus self-paced treadmill walking, a solution for a paradox. *J*  
514 *Neuroeng Rehabil.* 2015;12. doi:10.1186/s12984-015-0002-z
- 515 23. Sánchez N, Park S, Finley JM. Evidence of Energetic Optimization during Adaptation  
516 Differs for Metabolic, Mechanical, and Perceptual Estimates of Energetic Cost. *Sci Rep.*  
517 2017;7: 7682. doi:10.1038/s41598-017-08147-y
- 518 24. Finley JM, Bastian AJ, Gottschall JS. Learning to be economical : the energy cost of  
519 walking tracks motor adaptation. *J Physiol Physiol.* 2013;591: 1081–1095.  
520 doi:10.1113/jphysiol.2012.245506
- 521 25. Reisman DS, Block HJ, Bastian AJ. Interlimb coordination during locomotion: What can  
522 be adapted and stored? *J Neurophysiol.* 2005;94: 2403–2415. doi:10.1152/jn.00089.2005
- 523 26. Song J, Sigward S, Fisher B, Salem GJ. Altered dynamic postural control during step  
524 turning in persons with early-stage Parkinson’s disease. *Parkinsons Dis.* 2012;2012:  
525 386962. doi:10.1155/2012/386962
- 526 27. Havens KL, Mukherjee T, Finley JM. Analysis of biases in dynamic margins of stability  
527 introduced by the use of simplified center of mass estimates during walking and turning.  
528 *Gait Posture.* 2018;59: 162–167. doi:10.1016/j.gaitpost.2017.10.002
- 529 28. Kurz MJ, Arpin DJ, Corr B. Differences in the dynamic gait stability of children with  
530 cerebral palsy and typically developing children. *Gait Posture.* 2012;36: 600–604.  
531 doi:10.1016/j.gaitpost.2012.05.029
- 532 29. Reisman DS, Wityk R, Silver K, Bastian AJ. Split-Belt Treadmill Adaptation Transfers to

- 533 Overground Walking in Persons Poststroke. *Neurorehabil Neural Repair*. 2009;23: 735–  
534 744.
- 535 30. Dempster WT. Space requirements of the seated operator: geometrical, kinematic, and  
536 mechanical aspects other body with special reference to the limbs. WADC Technical  
537 Report. 1955. pp. 1–254. doi:AD 087892
- 538 31. Hanavan EP. A Mathematical Model of the human body. *Aerosp Med Rsearch Lab*. 1964;  
539 1–149.
- 540 32. Valero-Cuevas FJ, Klamroth-Marganska V, Winstein CJ, Riener R. Robot-assisted and  
541 conventional therapies produce distinct rehabilitative trends in stroke survivors. *J*  
542 *Neuroeng Rehabil*. 2016;13: 1–10. doi:10.1186/s12984-016-0199-5
- 543 33. Hothorn T, Bretz F, Westfall P. Simultaneous inference in general parametric models.  
544 *Biom J*. 2008;50: 346–363. doi:10.1002/bimj.200810425
- 545 34. Kuznetsova A, Brockhoff PB, Christensen RHB. **lmerTest** Package: Tests in Linear  
546 Mixed Effects Models. *J Stat Softw*. 2017;82. doi:10.18637/jss.v082.i13
- 547 35. Domkin D, Laczko J, Jaric S, Johansson H, Latash ML. Structure of joint variability in  
548 bimanual pointing tasks. *Exp Brain Res*. 2002;143: 11–23. doi:10.1007/s00221-001-0944-  
549 1
- 550 36. Papi E, Rowe PJ, Pomeroy VM. Analysis of gait within the uncontrolled manifold  
551 hypothesis: Stabilisation of the centre of mass during gait. *J Biomech*. 2015;48: 324–331.  
552 doi:10.1016/j.jbiomech.2014.11.024
- 553 37. Cappellini G, Ivanenko YP, Poppele R., Lacquaniti F. Motor Patterns in Human Walking  
554 and Running. *J Neurophysiol*. 2006;95: 3426–3437. doi:10.1152/jn.00081.2006
- 555 38. Pijnappels M, Kingma I, Wezenberg D, Reurink G, van Dieën JH. Armed against falls :  
556 the contribution of arm movements to balance recovery after tripping. *Exp Brain Res*.  
557 2010;201: 689–699. doi:10.1007/s00221-009-2088-7
- 558 39. Patterson KK, Mansfield A, Biasin L, Brunton K, Inness EL, McIlroy WE. Longitudinal  
559 changes in poststroke spatiotemporal gait asymmetry over inpatient rehabilitation.  
560 *Neurorehabil Neural Repair*. 2015;29: 153–162. doi:10.1177/1545968314533614
- 561 40. Gray V, Rice CL, Garland SJ. Factors that influence muscle weakness following stroke  
562 and their clinical implications: a critical review. *Physiother Canada*. 2012;64: 415–26.  
563 doi:10.3138/ptc.2011-03
- 564 41. Sharafi B, Hoffmann G, Tan AQ, Y. Dhaher Y. Evidence of impaired neuromuscular  
565 responses in the support leg to a destabilizing swing phase perturbation in hemiparetic  
566 gait. *Exp Brain Res*. 2016;234: 3497–3508. doi:10.1007/s00221-016-4743-0
- 567

A

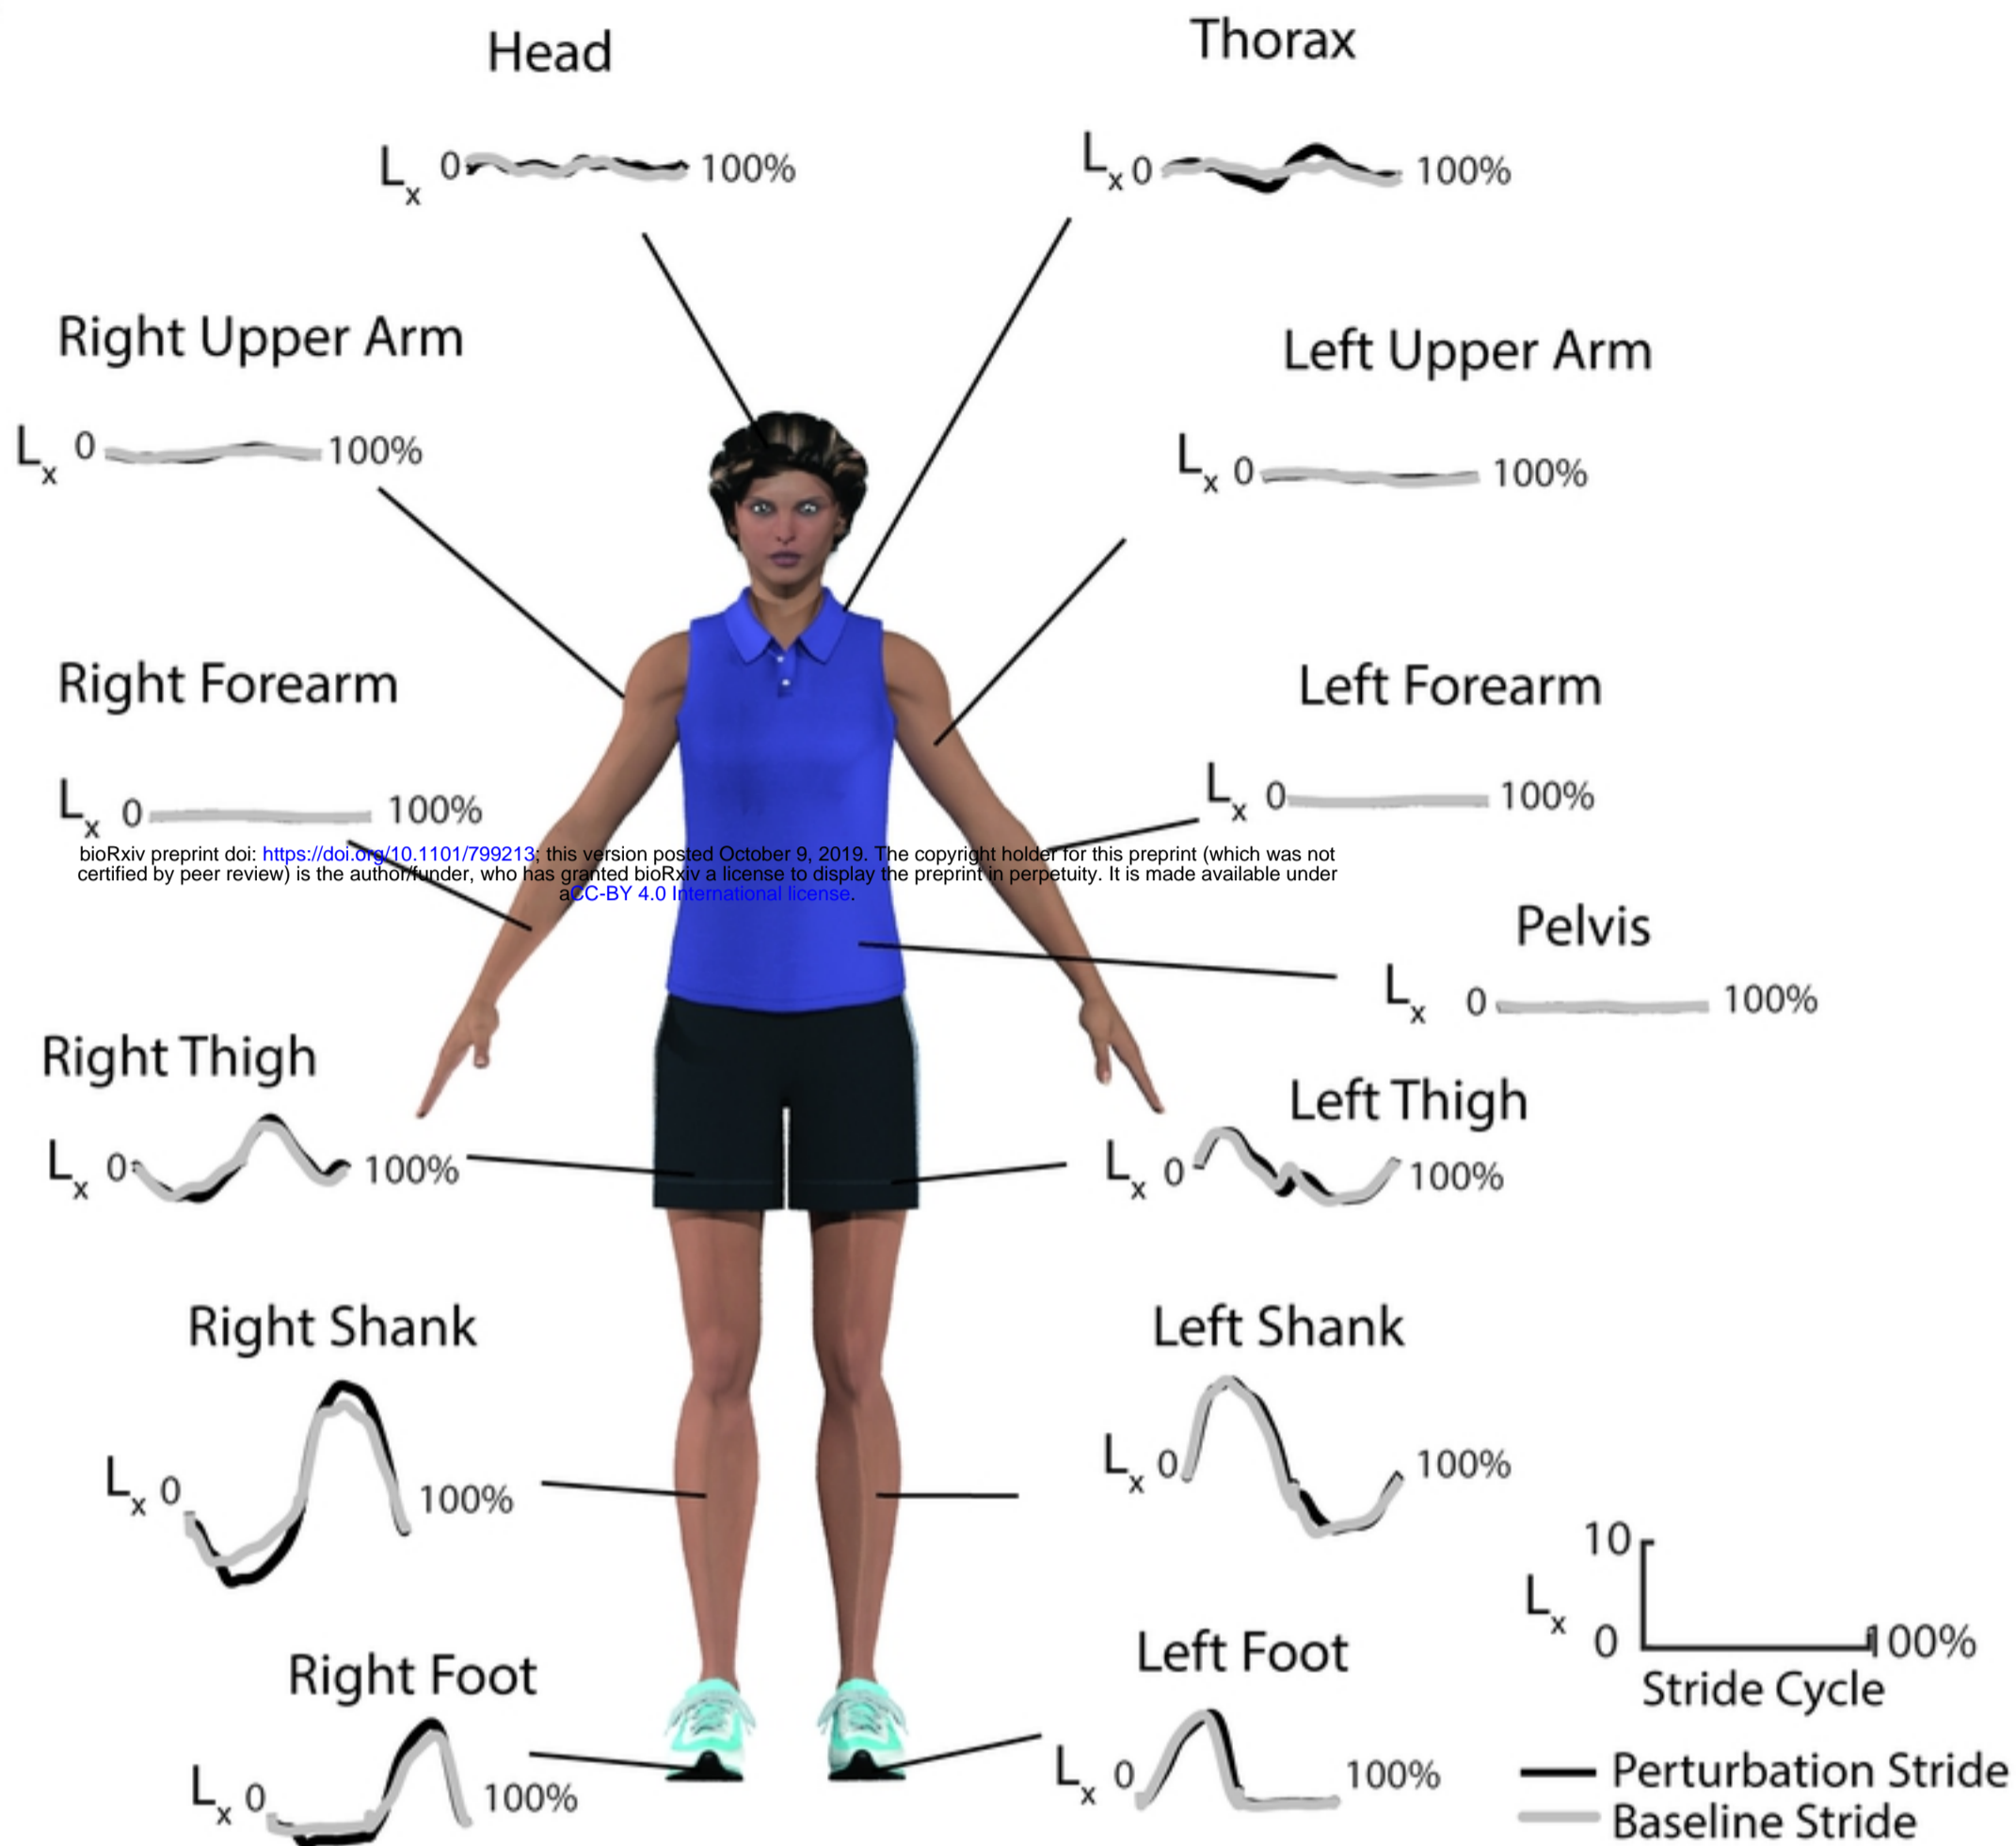

B

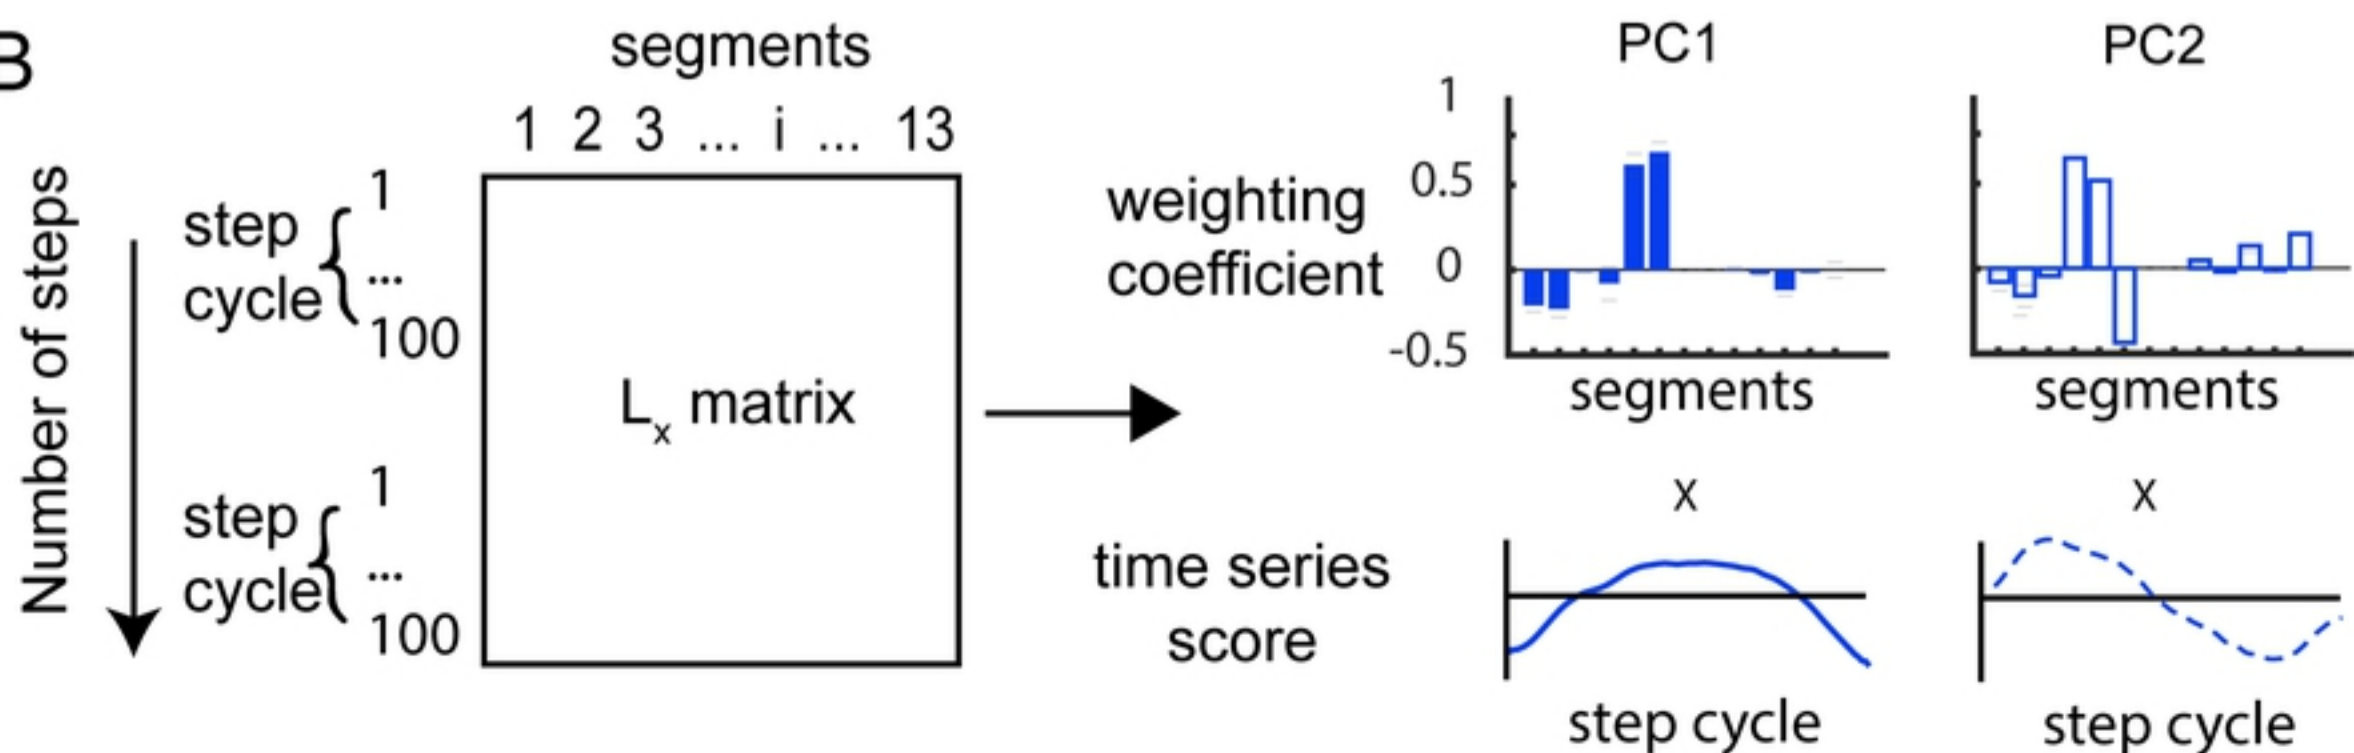

Figure 1

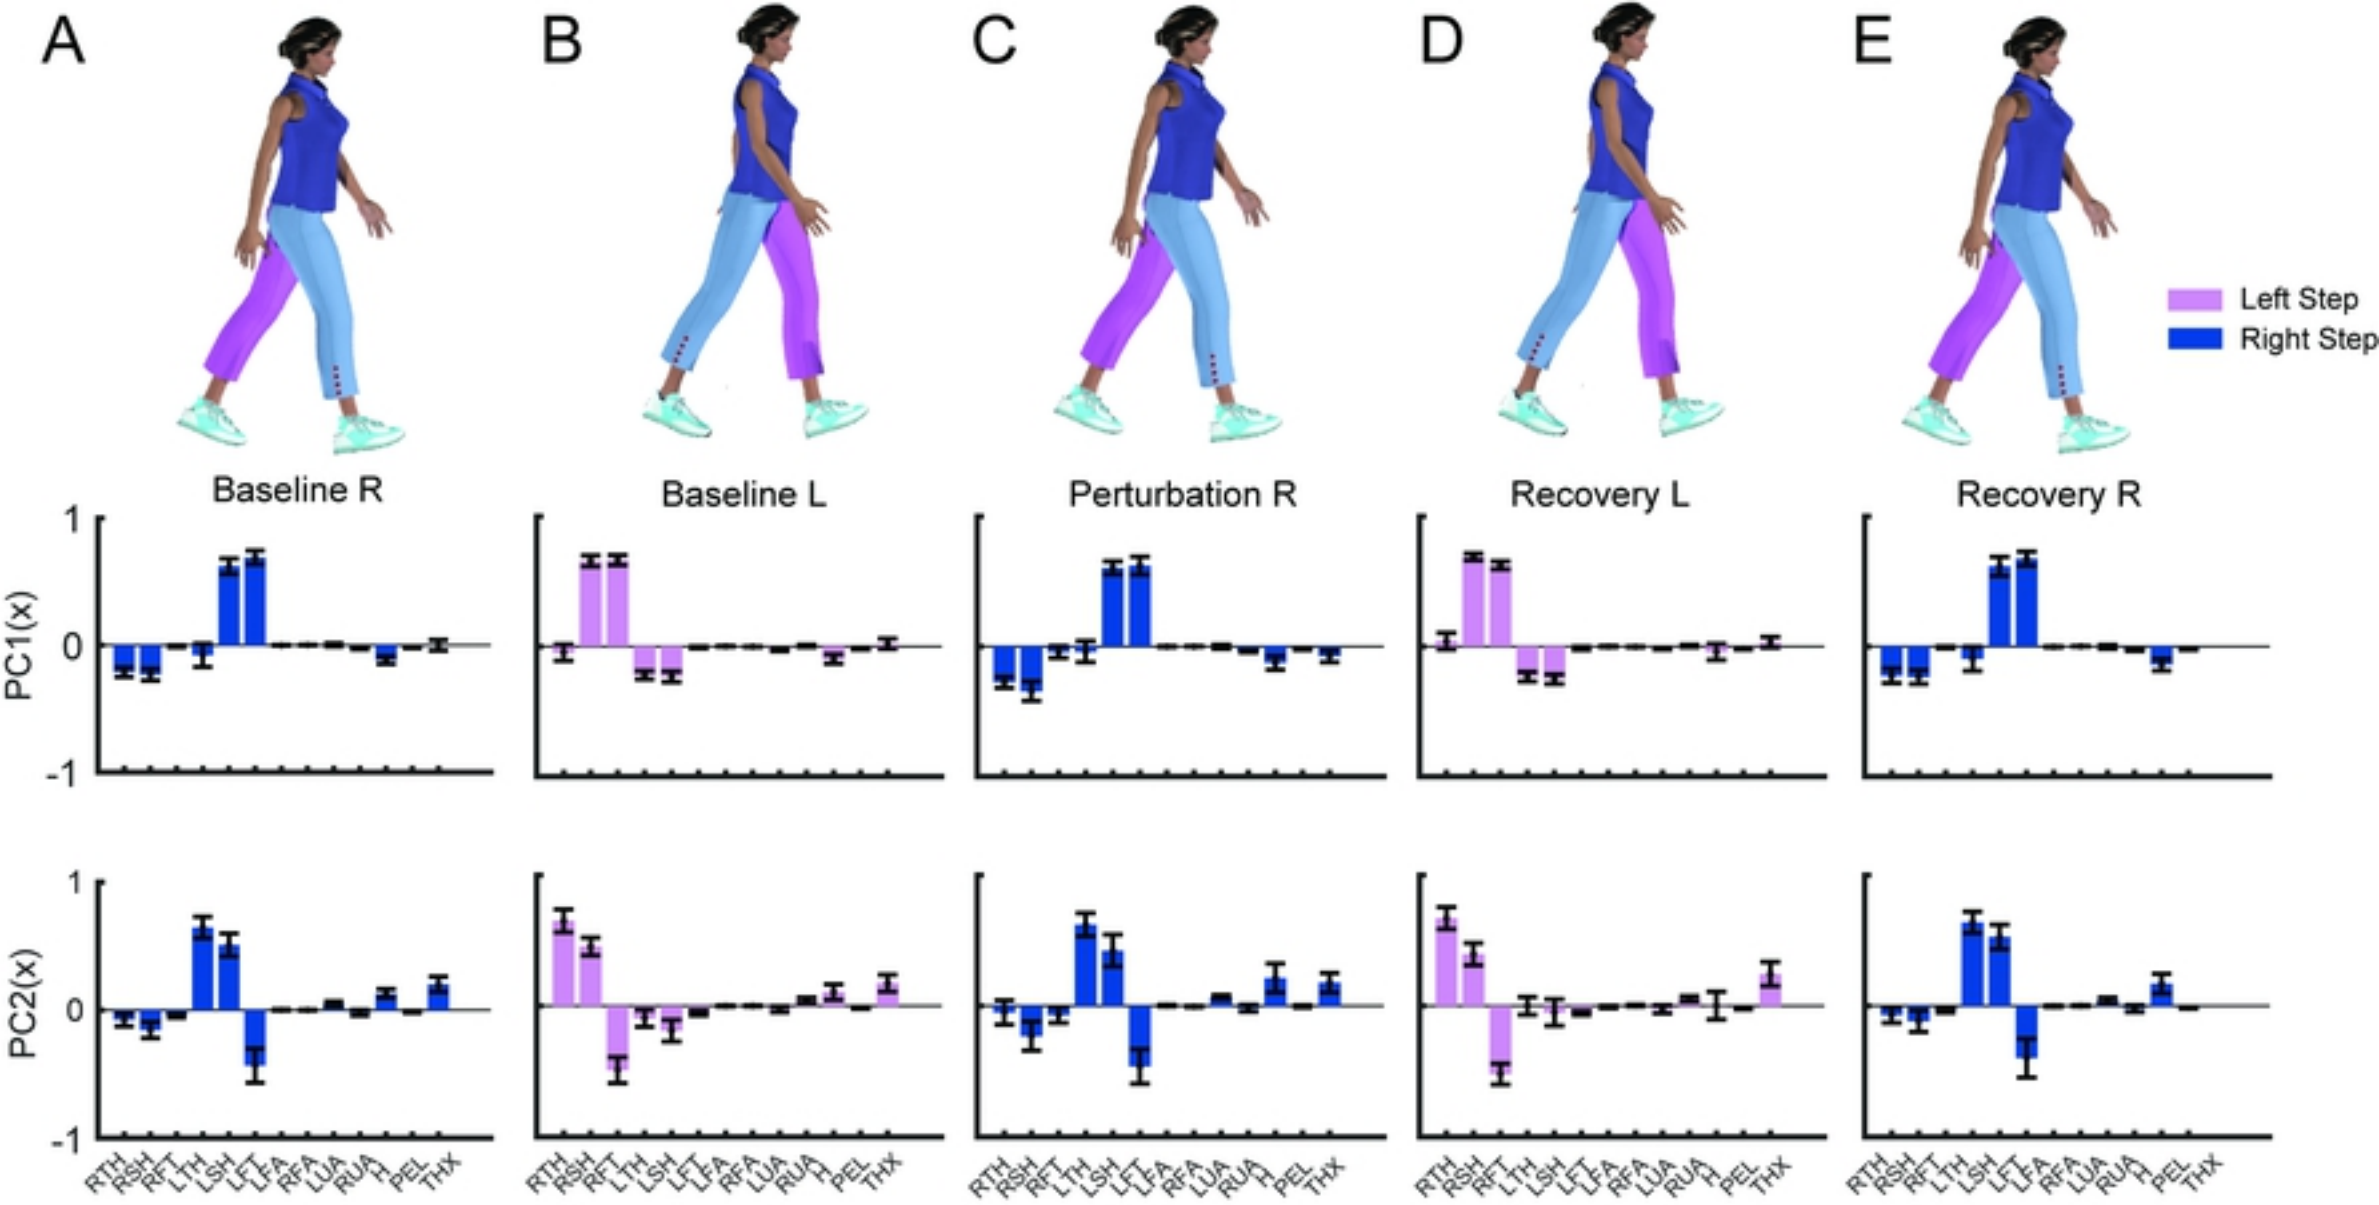

Figure 2

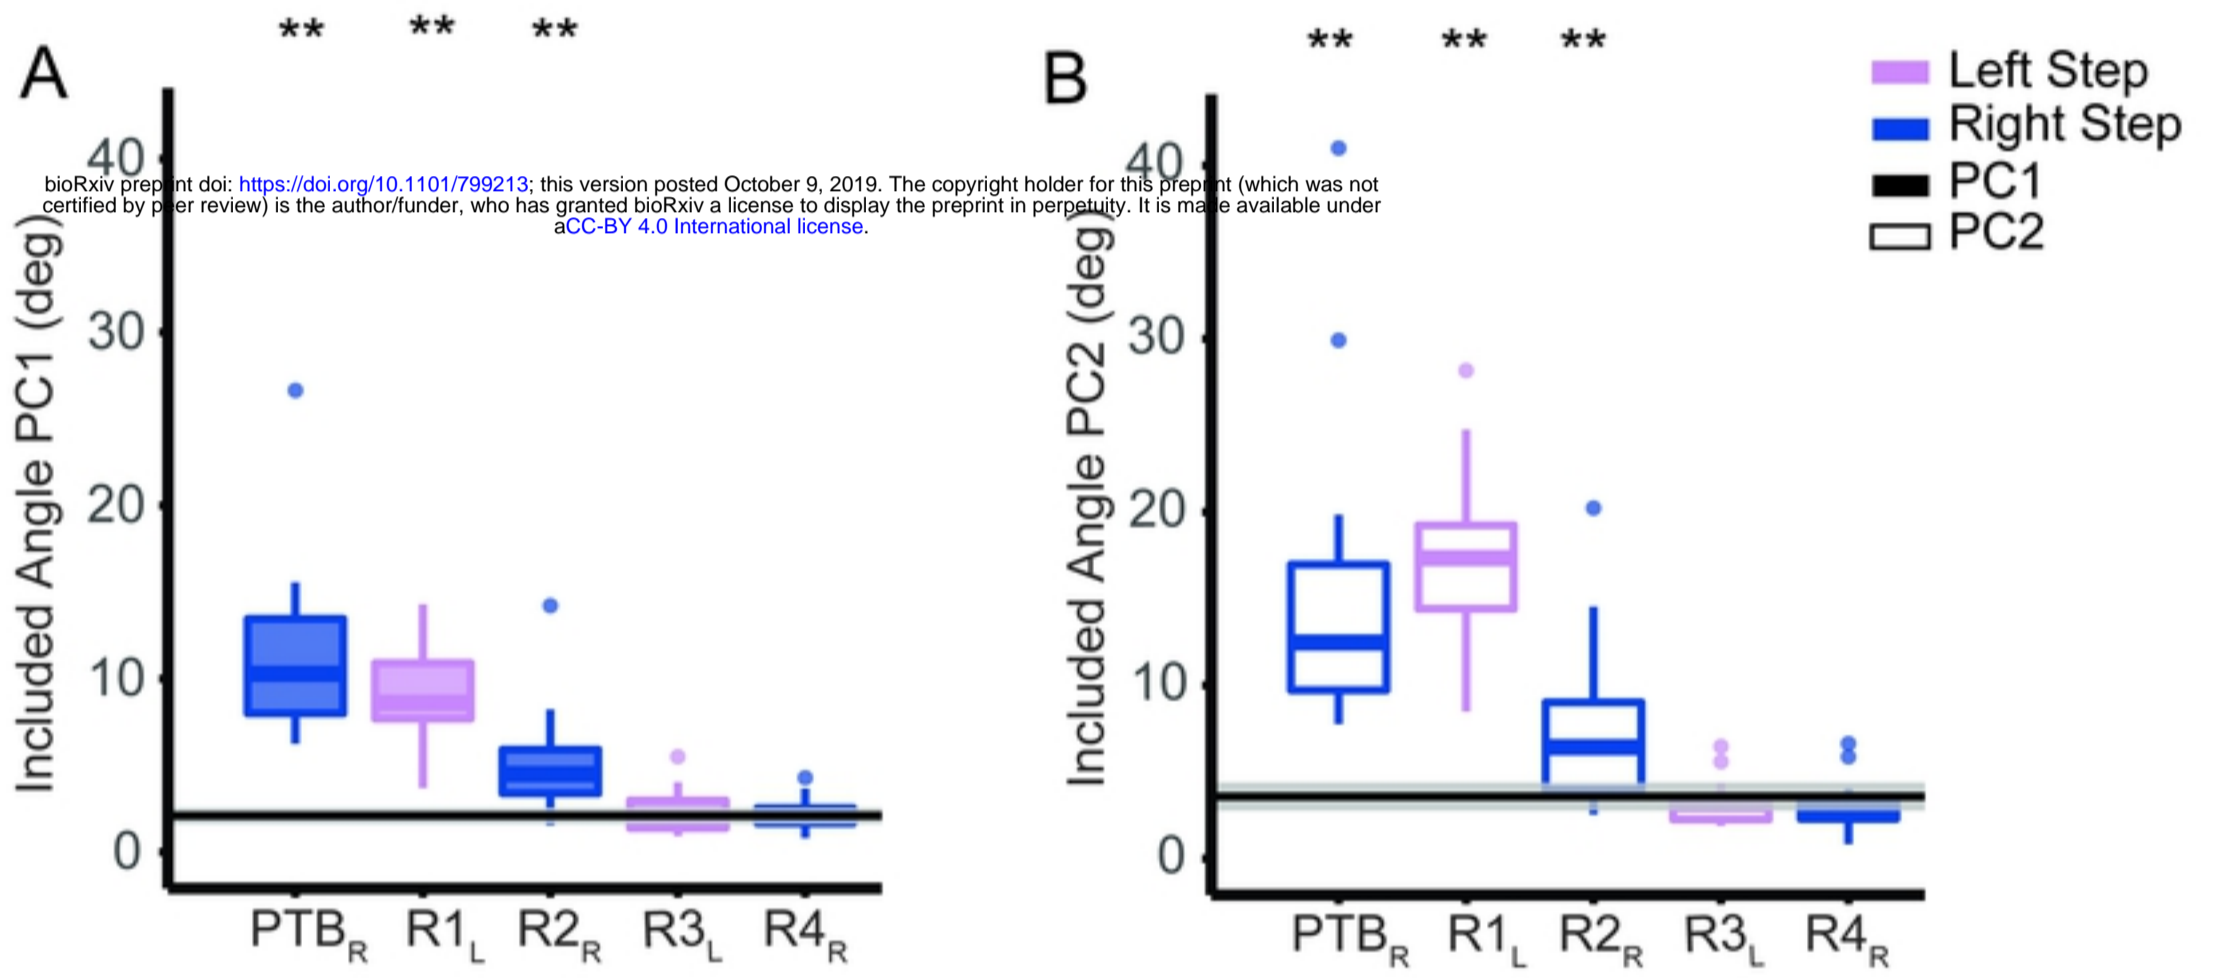

Figure 3



bioRxiv preprint doi: <https://doi.org/10.1101/799213>; this version posted October 9, 2019. The copyright holder for this preprint (which was not certified by peer review) is the author/funder, who has granted bioRxiv a license to display the preprint in perpetuity. It is made available under aCC-BY 4.0 International license.

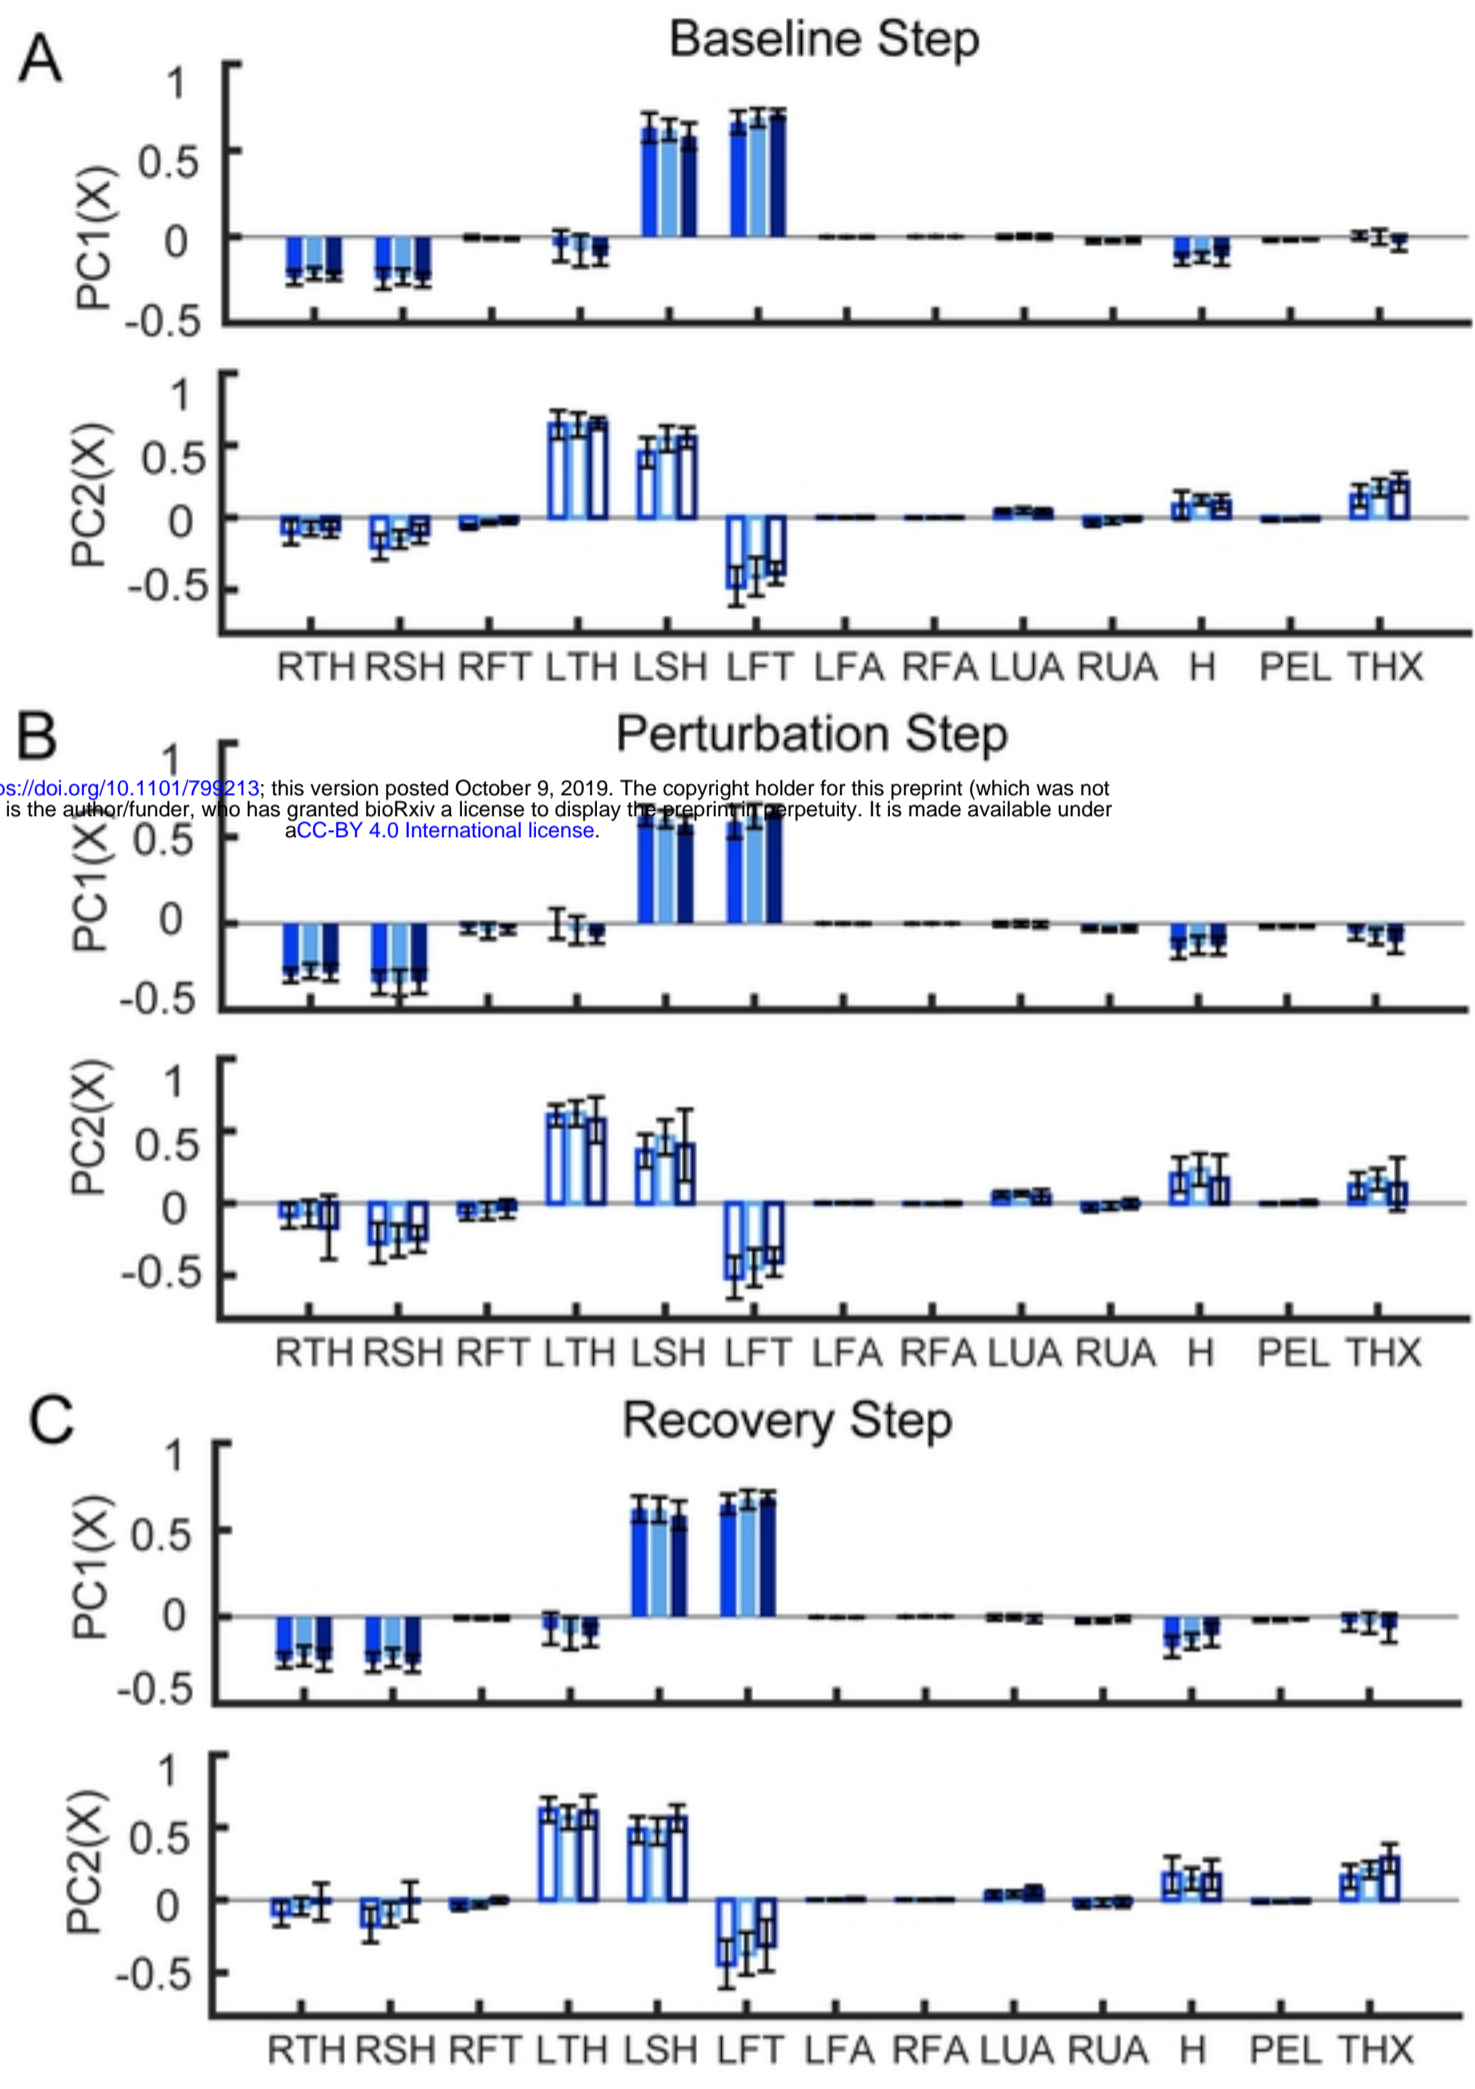

Figure 4

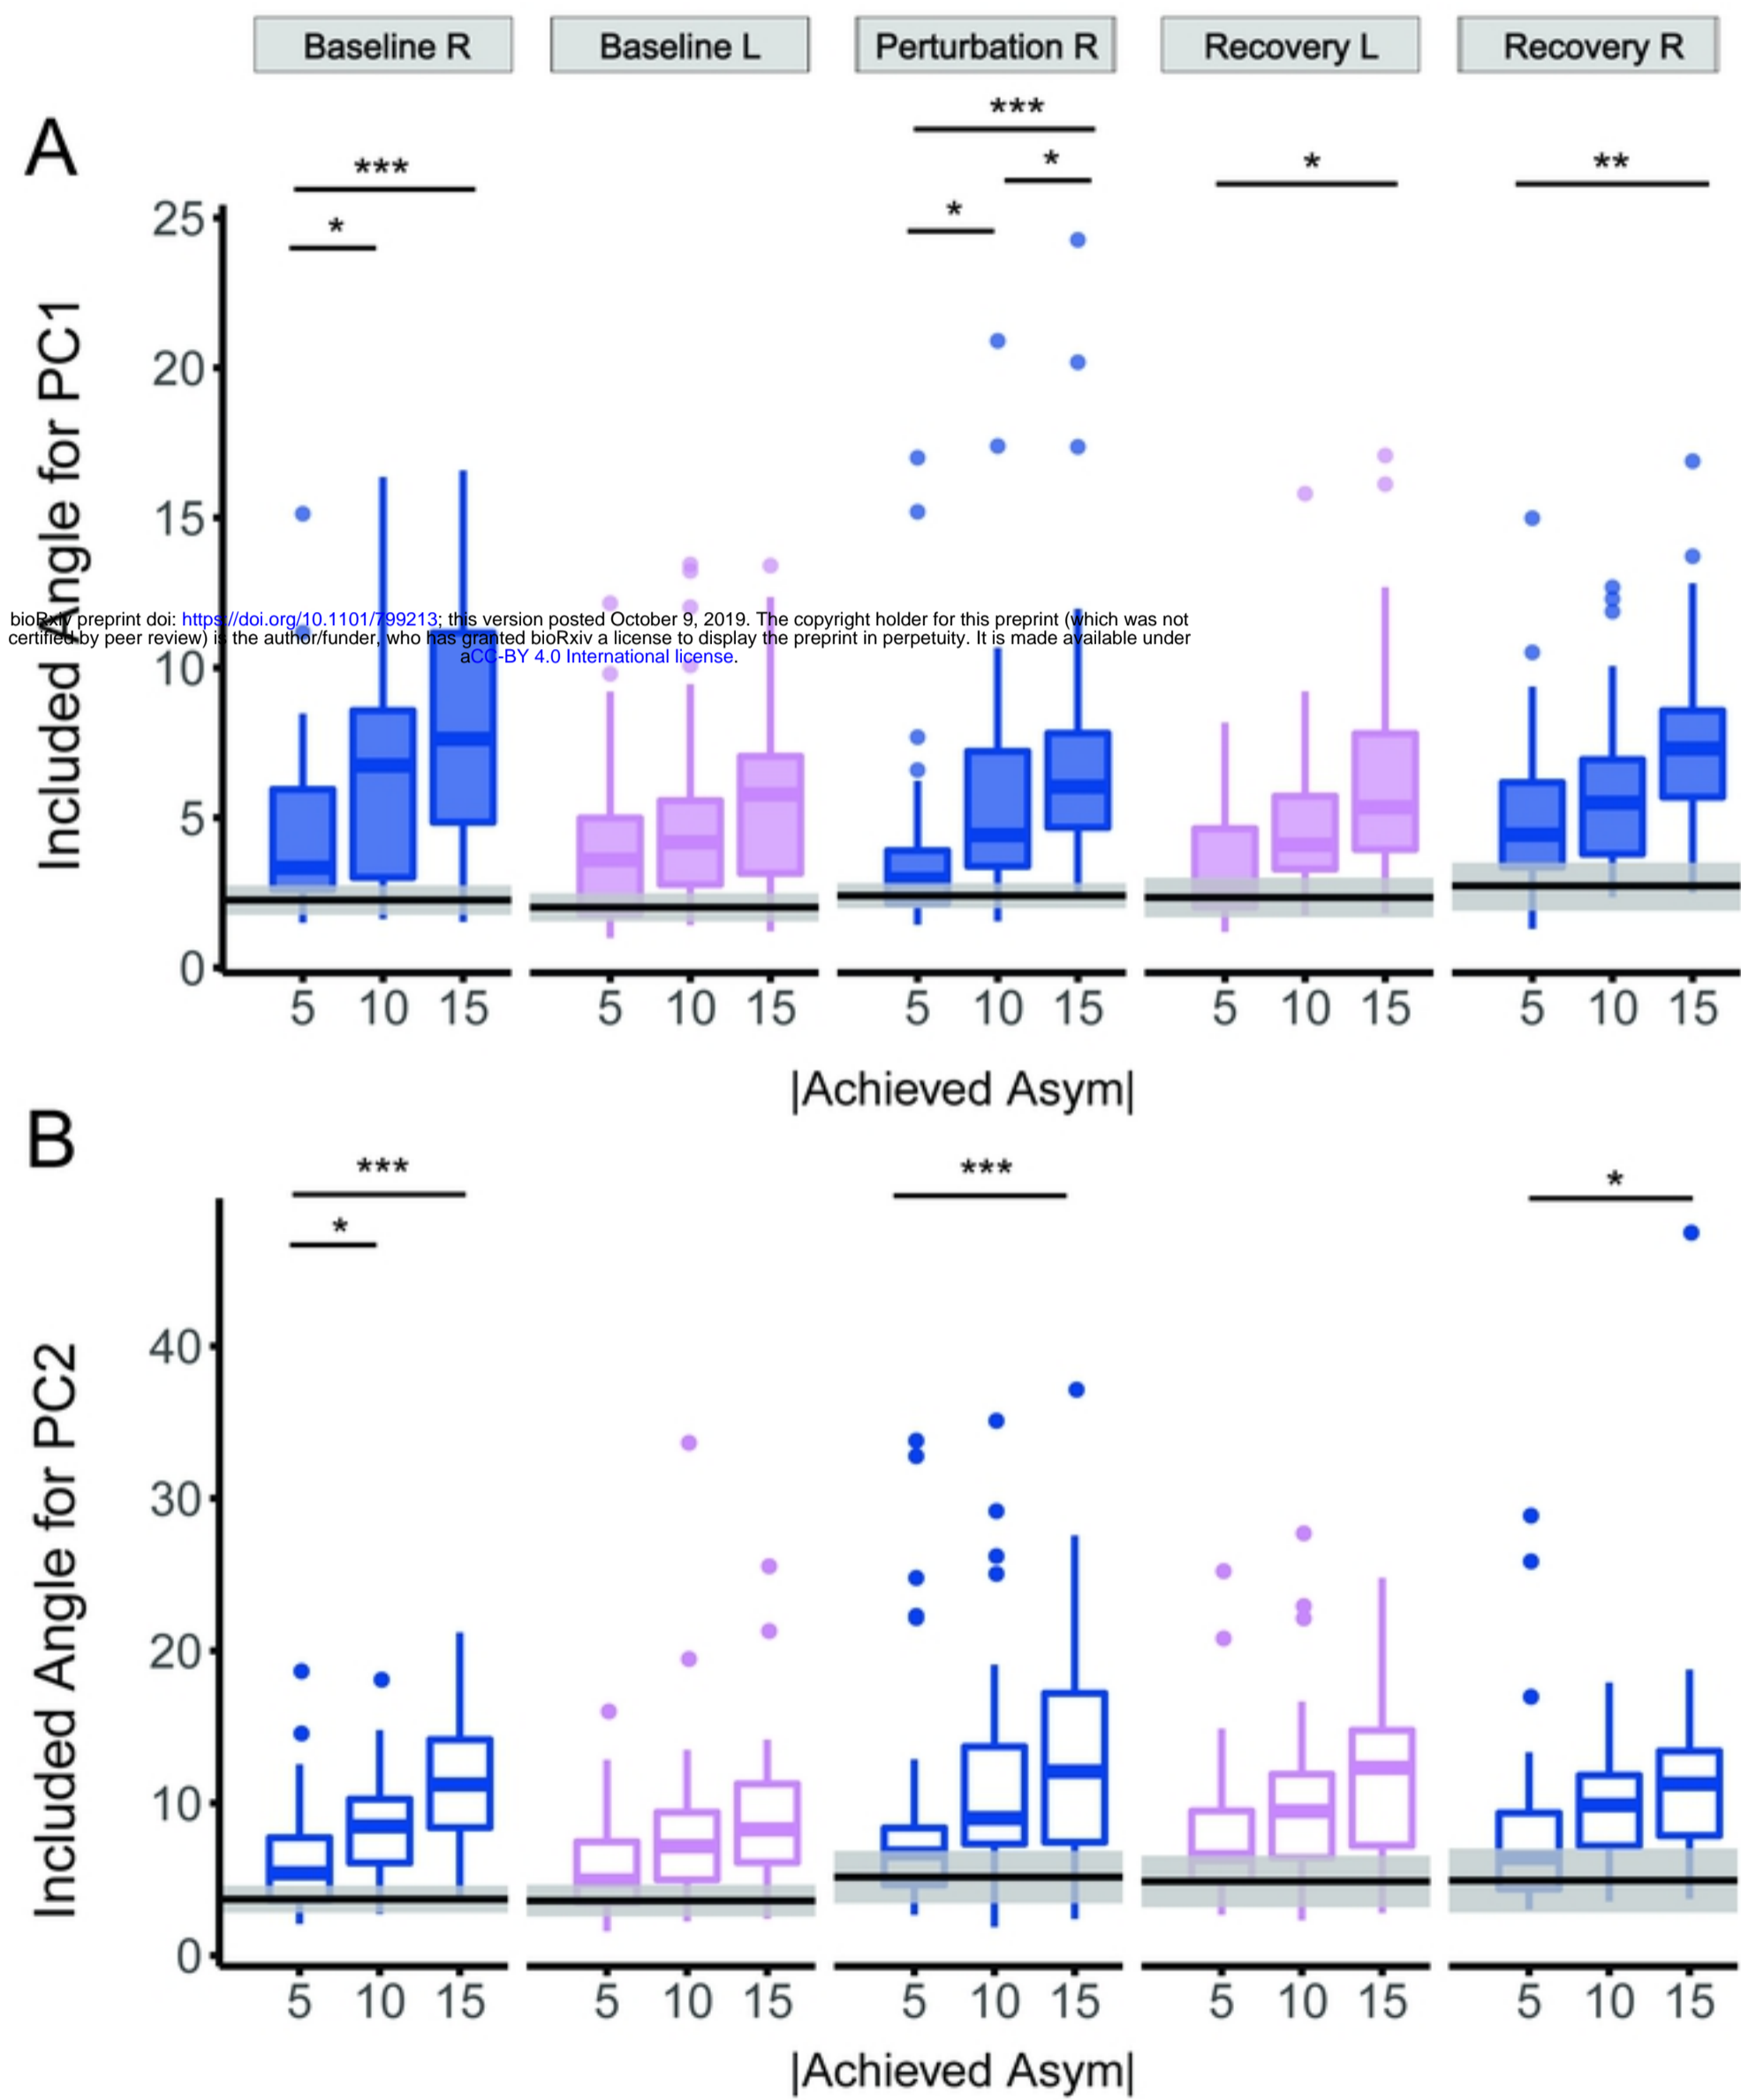

Figure 5
